# Supplementary material for: Miniaturized Electrochemical Sensors to Monitor Fetal Hypoxia and Acidosis in a Pregnant Sheep Model
Source: MDPI journal article supplement (doi:10.3390/biomedicines9101344), 2021-09-28
Supplement: s1 [file s1]

## Supplementary Materials

# Miniaturized Electrochemical Sensors to Monitor Fetal Hypoxia and Acidosis in a Pregnant Sheep Model

Míriam Illa <sup>1,2,\*</sup>, Laura Pla <sup>1</sup>, Sergio Berdún <sup>1</sup>, Mònica Mir <sup>3,4,5</sup>, Lourdes Rivas <sup>4</sup>, Samuel Dulay <sup>4</sup>, Nicole Picard-Hagen <sup>6</sup>, Josep Samitier <sup>3,4,5</sup>, Eduard Gratacós <sup>1,2,7,8</sup>, Elisenda Eixarch <sup>1,7,8</sup>

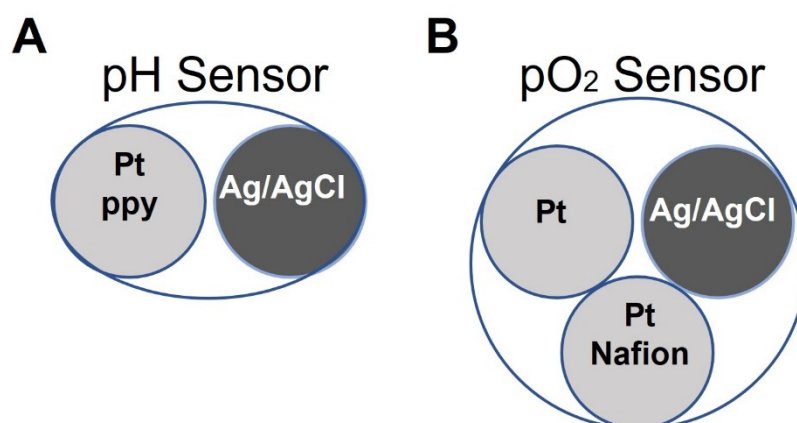

**Figure S1.** Scheme of miniaturized electrochemical sensors: pH and pO<sub>2</sub>. (A) Scheme of the pH sensor set up containing a platinum working electrode modified with a polypyrrole membrane specific to protons and a silver/silver chloride reference electrode. (B) Scheme of the oxygen sensor set up containing a platinum counter electrode, a silver/silver chloride reference electrode and a Nafion modified platinum working electrode.

**Table S1.** Acid-based metabolites results during the umbilical cord occlusion protocol.

| Time                                      |           | 0     | 10    | 20            | 30    | 35             | 40    | 50       | 60    |
|-------------------------------------------|-----------|-------|-------|---------------|-------|----------------|-------|----------|-------|
|                                           |           | BASAL |       | 50% OCCLUSION |       | 100% OCCLUSION |       | RECOVERY |       |
| pO <sub>2</sub><br>(mmHg)                 | n° values | 3     | 7     | 7             | 6     | 5              | 7     | 4        | 4     |
|                                           | Mean      | 22.70 | 22.64 | 17.57         | 20.95 | 9.62           | 11.73 | 24.70    | 23.38 |
|                                           | SD        | 3.58  | 3.14  | 5.67          | 2.57  | 4.39           | 4.81  | 5.51     | 2.45  |
|                                           | SEM       | 2.07  | 1.19  | 2.14          | 1.05  | 1.97           | 1.82  | 2.75     | 1.22  |
|                                           | n° values | 3     | 7     | 7             | 6     | 5              | 7     | 4        | 4     |
|                                           | Mean      | 7.27  | 7.24  | 7.13          | 7.17  | 6.94           | 6.86  | 6.98     | 7.06  |
| pH                                        | SD        | 0.03  | 0.04  | 0.08          | 0.07  | 0.09           | 0.1   | 0.07     | 0.08  |
|                                           | SEM       | 0.01  | 0.01  | 0.03          | 0.03  | 0.04           | 0.04  | 0.03     | 0.04  |
|                                           | n° values | 4     | 7     | 7             | 6     | 5              | 7     | 4        | 4     |
| Lactate<br>(mmol/L)                       | Mean      | 5.20  | 5.86  | 8.35          | 6.84  | 7.84           | 9.12  | 11.96    | 11.22 |
|                                           | SD        | 2.16  | 1.78  | 3.28          | 2.52  | 5.58           | 4.34  | 3.11     | 2.76  |
|                                           | SEM       | 1.08  | 0.67  | 1.24          | 1.03  | 2.49           | 1.64  | 1.55     | 1.38  |
| HCO <sub>3</sub> <sup>-</sup><br>(mmol/L) | n° values | 4     | 7     | 7             | 5     | 5              | 7     | 4        | 4     |
|                                           | Mean      | 26.25 | 24.93 | 24.50         | 24.96 | 21.54          | 19.76 | 19.18    | 18.50 |
|                                           | SD        | 3.35  | 3.03  | 3.69          | 2.77  | 5.96           | 3.40  | 3.63     | 1.74  |
|                                           | SEM       | 1.68  | 1.14  | 1.39          | 1.24  | 2.67           | 1.28  | 1.82     | 0.87  |
| K <sup>+</sup><br>(mmol/L)                | n° values | 4     | 7     | 7             | 6     | 5              | 7     | 4        | 4     |
|                                           | Mean      | 3.98  | 3.80  | 4.20          | 4.42  | 4.56           | 4.53  | 4.13     | 3.90  |
|                                           | SD        | 0.39  | 0.42  | 0.40          | 0.63  | 1.35           | 1.11  | 0.46     | 0.26  |
|                                           | SEM       | 0.19  | 0.16  | 0.15          | 0.26  | 0.60           | 0.42  | 0.23     | 0.13  |

**Table S2.** Electric current measured by oxygen electrochemical sensors during the umbilical cord occlusion protocol.

| Time                     |      | 0     | 10    | 20            | 30    | 35             | 40    | 50       | 60    |
|--------------------------|------|-------|-------|---------------|-------|----------------|-------|----------|-------|
|                          |      | BASAL |       | 50% OCCLUSION |       | 100% OCCLUSION |       | RECOVERY |       |
| n° values                |      | 2     | 5     | 7             | 6     | 7              | 3     | 5        | 3     |
| Electric current<br>(nA) | Mean | -3.68 | -4.01 | -3.63         | -3.10 | -2.31          | -2.75 | -4.31    | -2.50 |
|                          | SD   | 0.35  | 0.85  | 0.66          | 0.69  | 1.12           | 1.54  | 2.36     | 0.54  |
|                          | SEM  | 0.25  | 0.38  | 0.25          | 0.28  | 0.42           | 0.89  | 1.06     | 0.31  |

**Table S3.** Oxygen and pH results during the umbilical cord occlusion protocol from the animals used for oxygen electrochemical sensor evaluation.

| Time                      |      | 0     | 10    | 20            | 30    | 35             | 40    | 50       | 60    |
|---------------------------|------|-------|-------|---------------|-------|----------------|-------|----------|-------|
|                           |      | BASAL |       | 50% OCCLUSION |       | 100% OCCLUSION |       | RECOVERY |       |
| n° values                 |      | 3     | 6     | 6             | 5     | 5              | 6     | 4        | 4     |
| pO <sub>2</sub><br>(mmHg) | Mean | 22.83 | 22.15 | 17.67         | 20.12 | 9.620          | 10.45 | 24.70    | 23.38 |
|                           | SD   | 3.75  | 3.13  | 6.21          | 1.75  | 4.39           | 3.75  | 5.51     | 2.45  |
|                           | SEM  | 2.16  | 1.28  | 2.53          | 0.78  | 1.97           | 1.53  | 2.75     | 1.22  |
| n° values                 |      | 3     | 6     | 6             | 5     | 5              | 6     | 4        | 4     |
| pH                        | Mean | 7.24  | 7.23  | 7.13          | 7.17  | 6.94           | 6.84  | 6.98     | 7.06  |
|                           | SD   | 0.03  | 0.02  | 0.09          | 0.07  | 0.09           | 0.09  | 0.07     | 0.08  |
|                           | SEM  | 0.02  | 0.01  | 0.04          | 0.03  | 0.04           | 0.04  | 0.03     | 0.04  |

**Table S4.** Electric potential measured by pH electrochemical sensors during the umbilical cord occlusion protocol.

| Time                       |      | 0      | 10     | 20            | 30     | 35             | 40     | 50       | 60     |
|----------------------------|------|--------|--------|---------------|--------|----------------|--------|----------|--------|
|                            |      | BASAL  |        | 50% OCCLUSION |        | 100% OCCLUSION |        | RECOVERY |        |
| n° values                  |      | 5      | 9      | 10            | 7      | 10             | 3      | 9        | 6      |
| Electric potential<br>(mV) | Mean | 237.91 | 231.63 | 225.0         | 246.30 | 273.41         | 298.04 | 214.35   | 220.42 |
|                            | SD   | 78.65  | 65.10  | 27.15         | 41.12  | 55.43          | 56.30  | 21.85    | 31.54  |
|                            | SEM  | 35.17  | 21.70  | 8.585         | 15.54  | 17.53          | 32.51  | 7.284    | 12.88  |

**Table S5.** Oxygen and pH results during the umbilical cord occlusion protocol from the animals used for pH electrochemical sensor evaluation.

| Time                      |      | 0     | 10    | 20            | 30    | 35             | 40    | 50       | 60    |
|---------------------------|------|-------|-------|---------------|-------|----------------|-------|----------|-------|
|                           |      | BASAL |       | 50% OCCLUSION |       | 100% OCCLUSION |       | RECOVERY |       |
| n° values                 |      | 3     | 6     | 6             | 5     | 4              | 6     | 6        | 5     |
| pO <sub>2</sub><br>(mmHg) | Mean | 23.70 | 23.30 | 19.10         | 21.34 | 9.73           | 11.95 | 17.83    | 17.28 |
|                           | SD   | 3.08  | 2.86  | 4.36          | 2.66  | 5.07           | 5.23  | 6.41     | 7.53  |
|                           | SEM  | 1.78  | 1.17  | 1.78          | 1.19  | 2.53           | 2.14  | 2.62     | 3.37  |
| n° values                 |      | 3     | 6     | 6             | 5     | 4              | 6     | 6        | 5     |
| pH                        | Mean | 7.25  | 7.23  | 7.15          | 7.19  | 6.97           | 6.87  | 6.88     | 6.92  |
|                           | SD   | 0.04  | 0.04  | 0.06          | 0.05  | 0.06           | 0.11  | 0.12     | 0.19  |
|                           | SEM  | 0.03  | 0.02  | 0.02          | 0.02  | 0.03           | 0.04  | 0.05     | 0.09  |
